# Supplementary material for: Effects of Polycyclic Aromatic Hydrocarbons on the Composition of the Soil Bacterial Communities in the Tidal Flat Wetlands of the Yellow River Delta of China
Source: MDPI journal article supplement (doi:10.3390/microorganisms12010141), 2024-01-11
Supplement: s1 [file s1]

Table S1 The relative abundance (top 10) of soil bacterial communities in in two wetlands in yellow river delta of China.

|                        | P (%)     | CK (%)    |
|------------------------|-----------|-----------|
| <b>Phyla</b>           |           |           |
| Proteobacteria         | 36±3.8a   | 38±6.5a   |
| Actinobacteriota       | 11±2.0a   | 9±1.6a    |
| Chloroflexi            | 7±1.8a    | 8±3.4a    |
| Bacteroidota           | 8±3.8b    | 15±2.3a   |
| Acidobacteriota        | 6±2.3a    | 1±0.7b    |
| Gemmatimonadota        | 7±1.9a    | 4±0.2b    |
| Desulfobacterota       | 5±2.2b    | 8±0.4a    |
| Firmicutes             | 3±2.2b    | 8±1.8a    |
| Myxococcota            | 2±0.6a    | 1±0.4a    |
| unclassified           | 5±1.9a    | 1±0.3b    |
| <b>Class</b>           |           |           |
| Gammaproteobacteria    | 20±2.8a   | 17.1±2.2b |
| Alphaproteobacteria    | 16±2.0a   | 20.7±6.5a |
| Bacteroidia            | 6±2.9a    | 4.0±1.9b  |
| Anaerolineae           | 5±2.1b    | 11.4±2.1a |
| Actinobacteria         | 6±0.1a    | 6.8±2.7a  |
| Thermoanaerobaculia    | 4±1.2a    | 6.0±1.6a  |
| Desulfobulbia          | 3±1.1a    | 0.9±0.5b  |
| Desulfuromonadia       | 1±1.4a    | 0.7±0.4a  |
| Rhodothermia           | 3±1.2a    | 2.4±1.5a  |
| Unclassified           | 12±2.2a   | 2.5±1.7b  |
| <b>Genera</b>          |           |           |
| <i>Woeseia</i>         | 4.6±1.0a  | 0.1±0.0b  |
| <i>Dadabacteriales</i> | 1.5±0.4a  | 0.4±0.1b  |
| <i>Limibacillus</i>    | 1.1±0.7a  | 0.3±0.1b  |
| <i>Halofilum</i>       | 1.7±0.1a  | 0.3±0.1b  |
| <i>Rhodovibrio</i>     | 1.1±0.2a  | 0.1±0.0b  |
| <i>Sulfurovum</i>      | 1.0±0.1a  | 0.1±0.0b  |
| <i>Methylophaga</i>    | 0.9±0.3a  | 0.3±0.0b  |
| <i>Desulfobulbusc</i>  | 0.8±0.0a  | 0.4±0.0a  |
| <i>Muricauda</i>       | 0.5±0.0a  | 0.5±0.1a  |
| <i>unclassified</i>    | 37.6±3.2a | 35.4±4.7a |
